# Supplementary material
Source: PubMed Central journal article supplement (PMC3697539)
Supplement: JB.02169-12_zjb999092669so1.pdf [file JB.02169-12_zjb999092669so1.pdf]

## Supplemental material

### Anr, and its activation by PlcH activity, in *Pseudomonas aeruginosa* host colonization and virulence

Angelyca A. Jackson, Maegan J. Gross, Emily F. Daniels, Thomas H. Hampton, John H. Hammond, Isabelle Vallet-Gely, Simon L. Dove, Bruce A. Stanton, and Deborah A. Hogan

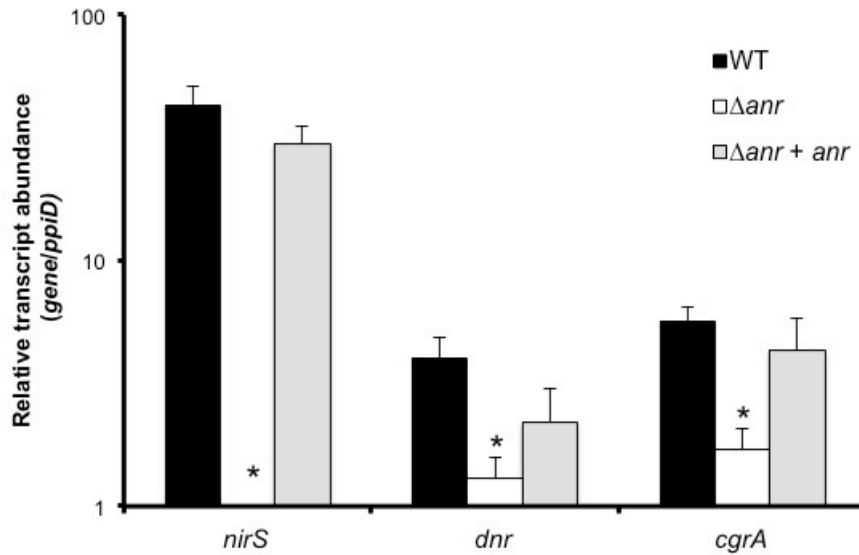

**Fig. S1. Anr regulates the expression of *nirS*, *dnr*, and *cgrA* transcripts.** Quantitative RT-PCR analysis of Anr-regulated transcripts (*nirS*, *dnr*, *cgrA*) normalized to the housekeeping gene *ppiD* in MOPS-glucose-surfactant medium, with additional choline (5 mM) and nitrate (5 mM). Data represent the means from three replicate cultures. \*  $P < 0.01$  difference from WT.

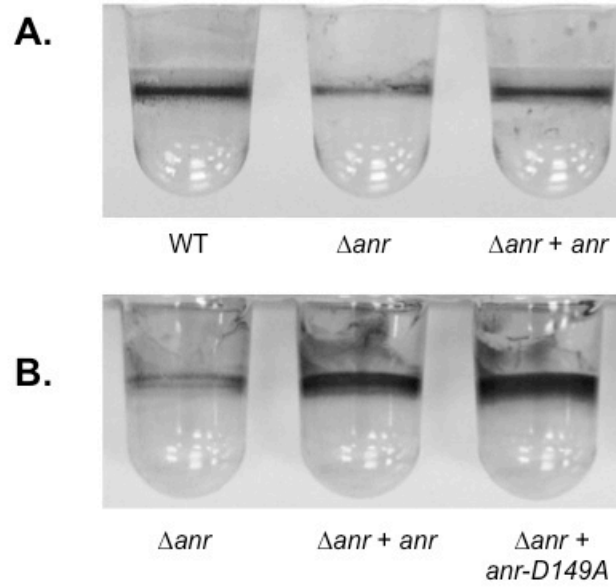

**Fig. S2. Anr promotes *P. aeruginosa* PAO1 biofilm formation in different laboratory strains and in minimal glucose medium. A.** PAO1 WT (DH2067),  $\Delta anr$ , and  $\Delta anr + anr$  biofilms in M63-glucose after 24 h. **B.** Biofilms formed by PAO1  $\Delta anr$  (DH1857),  $\Delta anr + anr$ , and  $\Delta anr + anr-D149A$  strains after 24 h in MOPS-glucose.

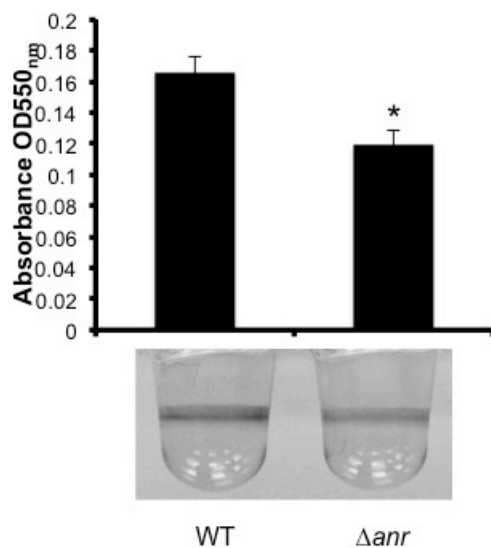

**Fig. S3. Anr promotes *P. aeruginosa* PA14 biofilm formation.** PA14 WT (DH2067) and  $\Delta anr$  biofilms in M63-glucose medium after 24 h. The difference is significant at  $P < 0.05$ .

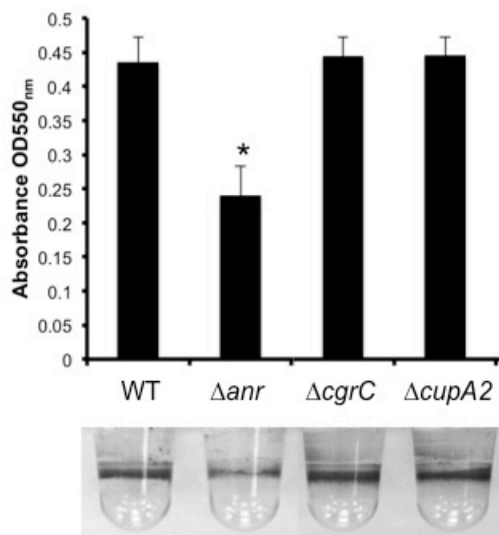

**Fig. S4. Anr control of cup fimbriae does not affect biofilm formation.** PAO1 biofilms in WT,  $\Delta anr$ ,  $\Delta cgrC$ , and  $\Delta cupA2$  strains after 24 h in MOPS-glucose medium.

Table S1. Reduction in expression of genes in *Pseudomonas aeruginosa* PAO1  $\Delta$ *plcHR* compared to wild type based on microarray data.

| PA no. | Gene         | Description                                            | Fold change | Reference(s) indicating regulation by Anr |
|--------|--------------|--------------------------------------------------------|-------------|-------------------------------------------|
| PA5475 |              |                                                        | -36.0       | (1)                                       |
| PA1673 |              |                                                        | -27.8       | (1)                                       |
| PA5027 |              |                                                        | -26.5       | (1)                                       |
| PA3337 | <i>rfaD</i>  | ADP-L-glycero-D-mannoheptose 6-epimerase               | -24.9       | (1, 2)                                    |
| PA2753 |              |                                                        | -23.7       |                                           |
| PA4348 |              |                                                        | -23.0       | (1)                                       |
| PA0527 | <i>dnr</i>   | Global nitrogen utilization regulator                  | -22.9       | (1, 3)                                    |
| PA3880 |              |                                                        | -22.1       |                                           |
| PA1196 |              |                                                        | -21.8       |                                           |
| PA2119 |              | Zn-dependent alcohol dehydrogenase                     | -19.5       | (1)                                       |
| PA0200 |              |                                                        | -18.5       | (1)                                       |
| PA4687 | <i>ccpR</i>  | Cytochrome c551 peroxidase precursor                   | -17.9       | (1)                                       |
| PA0519 | <i>nirS</i>  | Nitrite reductase precursor                            | -14.7       | (1, 4)                                    |
| PA1546 | <i>hemN</i>  | O <sub>2</sub> -independent coproporphyrinogen oxidase | -13.8       | (1, 5)                                    |
| PA3006 | <i>psrA</i>  |                                                        | -12.1       |                                           |
| PA4610 |              |                                                        | -11.6       |                                           |
| PA5232 |              |                                                        | -11.1       | (1)                                       |
| PA4577 |              |                                                        | -9.9        | (1)                                       |
| PA0141 |              |                                                        | -9.6        | (1)                                       |
| PA1556 | <i>ccoO2</i> | Cbb-3 cytochrome c oxidase                             | -9.4        |                                           |
| PA5446 |              |                                                        | -9.3        |                                           |
| PA1746 |              |                                                        | -8.9        | (1)                                       |
| PA1557 | <i>ccoN2</i> | Cbb-3 cytochrome c oxidase                             | -8.8        | (1, 6)                                    |
| PA4067 | <i>oprG</i>  | Outer membrane protein G                               | -8.2        | (1) (7)                                   |
| PA5427 | <i>adhA</i>  | Alcohol dehydrogenase                                  | -7.9        | (1)                                       |
| PA1429 |              |                                                        | -7.3        |                                           |
| PA4571 |              |                                                        | -7.2        |                                           |
| PA4762 | <i>grpE</i>  | Heat shock protein                                     | -7.2        |                                           |
| PA4352 |              |                                                        | -6.8        | (1)                                       |
| PA5053 | <i>hslV</i>  | Heat shock protein                                     | -6.5        |                                           |
| PA2663 | <i>ppyR</i>  | Psl and pyoverdinin regulator                          | -6.2        |                                           |
| PA4542 | <i>clpB</i>  | Protease chaperone B                                   | -6.1        |                                           |
| PA0201 |              |                                                        | -6.1        |                                           |
| PA1596 | <i>htpG</i>  | Heat shock protein G                                   | -6.0        |                                           |
| PA3523 |              |                                                        | -5.6        |                                           |
| PA3678 |              | Probable transcriptional regulator                     | -5.5        |                                           |
| PA2127 | <i>cgrA</i>  |                                                        | -5.2        | (1) (8)                                   |
| PA5440 | <i>yegQ</i>  |                                                        | -5.1        |                                           |
| PA3677 |              |                                                        | -5.1        |                                           |

Table S2. Transcripts more highly expressed in *Pseudomonas aeruginosa* PAO1  $\Delta$ *plcH* compared to wild type

| PA no. | Gene         | Description                    | Fold change | Reference(s) indicating regulation by Anr |
|--------|--------------|--------------------------------|-------------|-------------------------------------------|
| PA0059 | <i>osmC</i>  |                                | 9.2         |                                           |
| PA0355 | <i>pfpL</i>  | Intracellular protease         | 7.1         |                                           |
| PA0567 |              |                                | 17.7        |                                           |
| PA1323 |              |                                | 8.7         |                                           |
| PA1324 |              |                                | 7.2         |                                           |
| PA1404 |              |                                | 8.0         |                                           |
| PA1874 |              |                                | 5.1         |                                           |
| PA1887 |              |                                | 5.2         |                                           |
| PA1888 |              |                                | 5.2         |                                           |
| PA2021 |              |                                | 5.5         |                                           |
| PA2134 |              |                                | 5.2         |                                           |
| PA2143 |              |                                | 10.0        |                                           |
| PA2149 |              |                                | 5.2         |                                           |
| PA2151 |              |                                | 5.8         |                                           |
| PA2165 |              | Amino acid peptidase/glucanase | 5.2         |                                           |
| PA2166 |              |                                | 5.7         |                                           |
| PA2167 |              |                                | 5.4         |                                           |
| PA2168 |              |                                | 5.4         |                                           |
| PA2170 |              |                                | 5.6         |                                           |
| PA2171 |              | Hypothetical                   | 10.7        |                                           |
| PA2172 |              |                                | 5.9         |                                           |
| PA2173 |              |                                | 6.0         |                                           |
| PA2176 |              | FixL-like                      | 6.5         |                                           |
| PA2433 |              |                                | 8.6         |                                           |
| PA2747 |              |                                | 9.5         |                                           |
| PA3032 | <i>snr1</i>  | Cytochrome c                   | 6.8         |                                           |
| PA3274 |              |                                | 8.4         |                                           |
| PA3369 |              |                                | 8.6         |                                           |
| PA3370 |              |                                | 6.7         |                                           |
| PA3371 |              |                                | 6.4         |                                           |
| PA3691 |              |                                | 6.1         |                                           |
| PA3692 | <i>lptF</i>  | Lipotoxin                      | 8.4         |                                           |
| PA3930 | <i>cioA</i>  | Cyanide-insensitive oxidase    | 6.8         | (1, 9)                                    |
| PA4648 | <i>cupE1</i> | Pilin subunit <i>cupE1</i>     | 8.9         |                                           |
| PA4649 |              |                                | 5.1         |                                           |
| PA4738 |              |                                | 7.2         |                                           |
| PA4739 |              |                                | 5.7         |                                           |
| PA4877 |              |                                | 6.8         |                                           |
| PA4880 |              | Probable bacteroferritin       | 16.6        |                                           |
| PA5212 |              |                                | 5.3         |                                           |
| PA5481 |              |                                | 8.5         |                                           |
| PA5482 |              |                                | 15.3        |                                           |

1. **Trunk, K., B. Benkert, N. Quack, R. Munch, M. Scheer, J. Garbe, L. Jansch, M. Trost, J. Wehland, J. Buer, M. Jahn, M. Schobert, and D. Jahn.** 2010. Anaerobic adaptation in *Pseudomonas aeruginosa*: definition of the Anr and Dnr regulons. *Environ Microbiol* **12**:1719-33.
2. **Sanchez-Torres, V., Maeda, T., Wood, TK.** 2010. Global regulator H-NS and lipoprotein Nlpl influence production of extracellular DNA in *Escherichia coli*. *Biochem Biophys Res Commun* **401**:197-202.
3. **Arai, H., T. Kodama, and Y. Igarashi.** 1997. Cascade regulation of the two CBP/FNR-related transcriptional regulators (ANR and DNR) and the denitrification enzymes in *Pseudomonas aeruginosa*. *Mol Microbiol* **25**:1141-1148.
4. **Arai, H., Igarashi, Y. and T. Kodama.** 1995. Expression of the *nir* and *nor* genes for denitrification of *Pseudomonas aeruginosa* requires a novel CRP/FNR related transcriptional regulator, DNR, in addition to ANR. *FEBS Letters* **371**:73-76.
5. **Rompf A., H., C., Hoffmann, T., Lindenmeyer, M., Romling, U., Gross, U., Doss MO., Arai, H., Igarashi, Y., and D. Jahn.** 1998. Regulation of *Pseudomonas aeruginosa hemF* and *hemN* by the dual action of the redox response regulator Anr and Dnr. *Mol Microbiol* **29**:985-997.
6. **Kawakami, T., Kuroki, M., Ishii, M., Igarashi, Y., and H. Arai.** 2010. Differential expression of multiple terminal oxidases for aerobic respiration in *Pseudomonas aeruginosa*. *Environ Microbiol* **12**:1399-1412.
7. **McPhee, J., Tamber, S., Bains, M., Maier, E., Gellatly, S., Lo, A., Benz, R., and R.E. Hancock.** 2009. The major outer membrane protein OprG of *Pseudomonas aeruginosa* contributes to cytotoxicity and forms an anaerobically regulated, cation-selective channel. *Fems Microbiol Lett* **296**:241-247.
8. **Vallet-Gely, I., K. E. Donovan, R. Fang, J. K. Joung, and S. L. Dove.** 2005. Repression of phase-variable cup gene expression by H-NS-like proteins in *Pseudomonas aeruginosa*. *Proc Natl Acad Sci U S A* **102**:11082-7.
9. **Cooper, M., Tavankar, GR., Williams, HD.** 2003. Regulation of expression of the cyanide-insensitive terminal oxidase in *Pseudomonas aeruginosa*. *Microbiology* **149**:1275-1284.
